# Supplementary material for: A photo-controllable third-order nonlinear optical (NLO) switch based on a rhodamine B salicylaldehyde hydrazone metal complex
Source: Royal Society of Chemistry journal article supplement (doi:10.1039/c6tc01549b), 2016-01-01
Supplement: c6tc01549b1.pdf [file c6tc01549b1.pdf]

## Photo-controllable Third-Order Nonlinear Optical (NLO) Switch based on Rhodamine B Salicylaldehyde Hydrazone metal Complex

Qi Feng,<sup>1</sup> Yuanyuan Li,<sup>2</sup> Guang Shi,<sup>3</sup> Lili Wang,<sup>1</sup> Wenjing Zhang,<sup>1</sup> Kai Li,<sup>\*,1</sup> Hongwei Hou<sup>\*,1</sup> and Yinglin Song<sup>\*,3</sup>

<sup>1</sup> College of Chemistry and Molecular Engineering, Zhengzhou University, Henan 450001, P. R. China

<sup>2</sup> School of Chemistry and Chemical Engineering, Henan University of Technology, Henan 450001, P. R. China

<sup>3</sup> Department of Applied Physics, Harbin Institute of Technology, Harbin 150001, P.R. China

\*Correspondence and requests for materials should be addressed to K. L. (likai@zzu.edu.cn), H. W. H.

(houhongw@zzu.edu.cn) or (ylsong@hit.edu.cn).

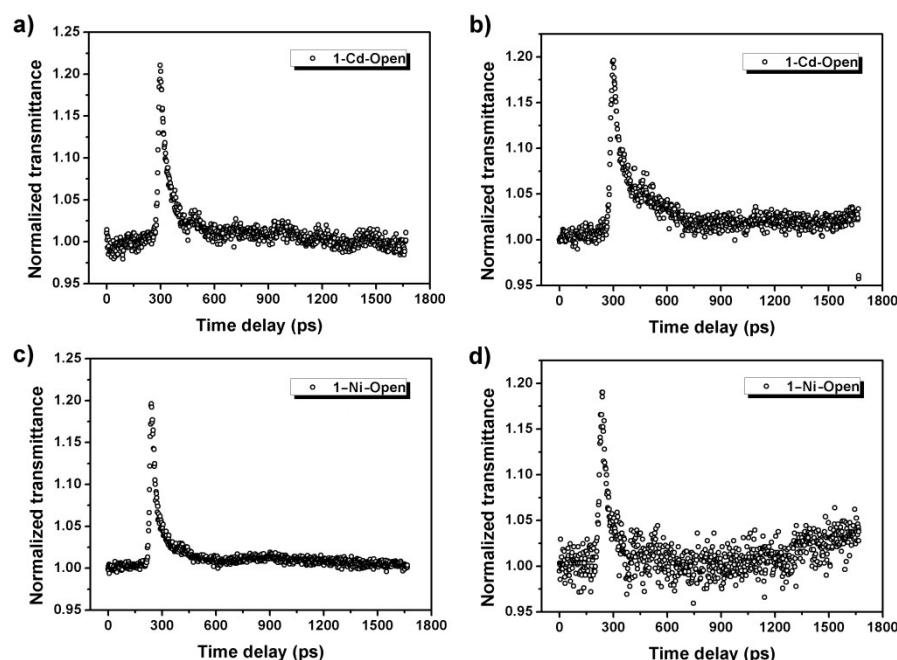

**Figure S1.** a), c) Open aperture and b), d) close aperture PO-pump-probe results of **1-Cd-Open** and **1-Ni-Open**. Conditions:  $[1\text{-Cd}] = [1\text{-Ni}] = 5 \times 10^{-5}$  mol/L in THF solution, 2 mm quartz cells.

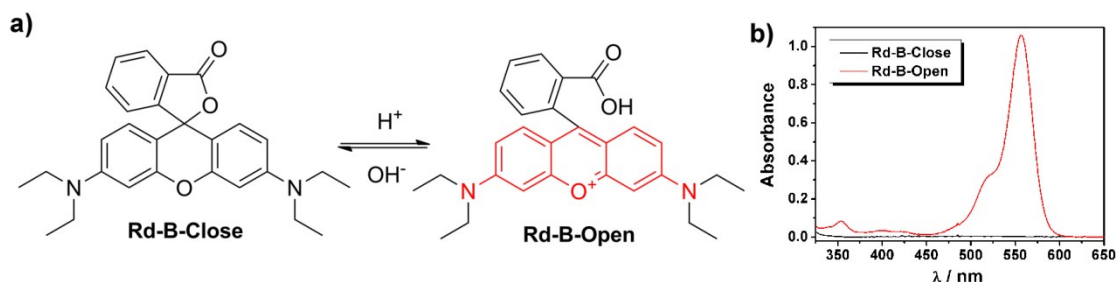

**Figure S2.** a) The known tautomerism of **Rd-B** in the presence of acid or base and b) the corresponding absorption spectra. Conditions:  $[\text{Rd-B}] = 5 \times 10^{-5}$  mol/L in THF solution, 2 mm quartz cells.

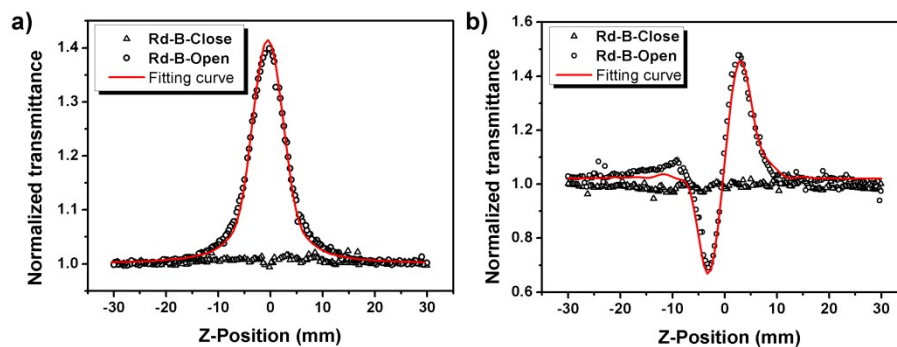

**Figure S3.** a) open-aperture and b) closed-aperture top-hat Z-scan results of **Rd-B-Close** and **Rd-B-Open**. Conditions:  $[\text{Rd-B}] = 5 \times 10^{-5} \text{ mol/L}$  in THF solution, 2 mm quartz cells.

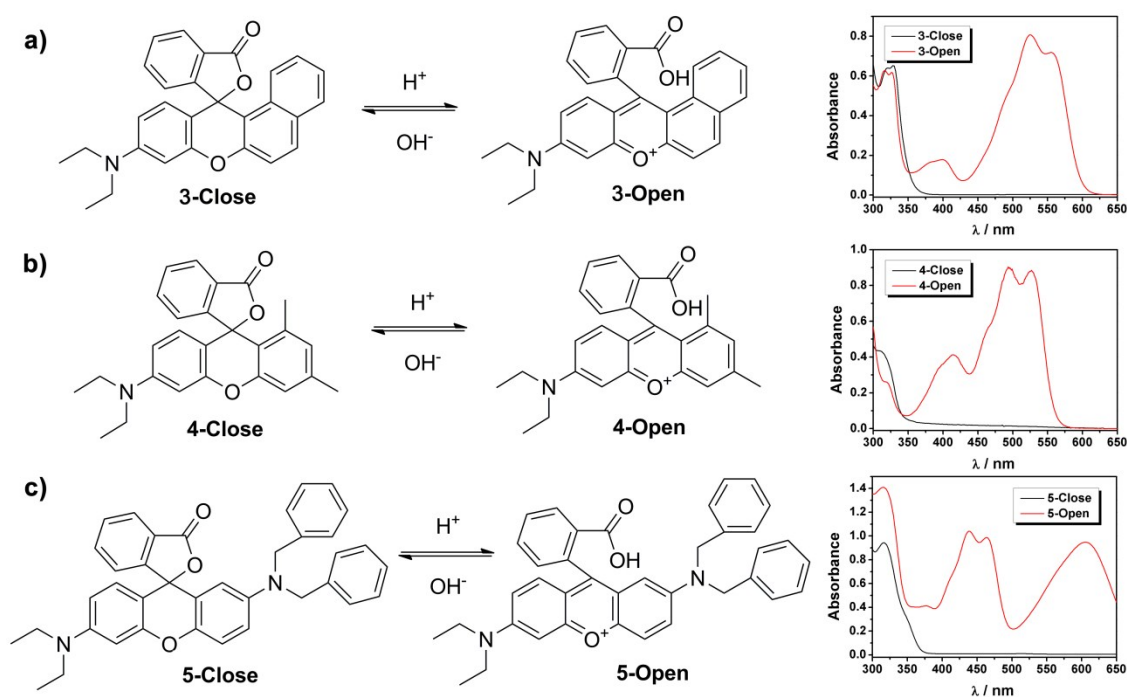

**Figure S4.** The known tautomerism and corresponding absorption spectra of **3-5** in the presence of acid or base. Conditions:  $[\text{3}] = 5 \times 10^{-4} \text{ mol/L}$ ,  $[\text{4}] = 5 \times 10^{-4} \text{ mol/L}$ ,  $[\text{5}] = 5 \times 10^{-4} \text{ mol/L}$  in THF solution, 2 mm quartz cells. The conjugations of **3-5** are adjusted by the addition of TFA and TEA.

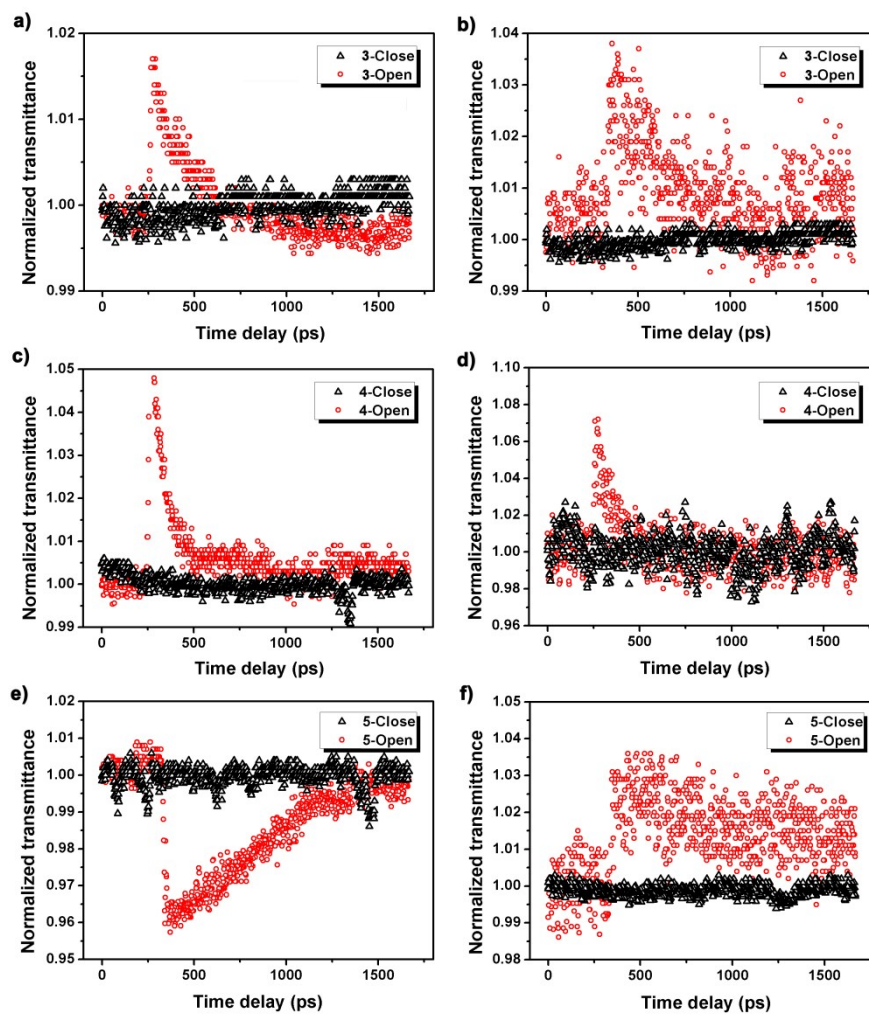

**Figure S5.** a), c) and e) open-aperture and b), d) and f) close-aperture PO-pump-probe results of **3-5**. Conditions:  $[3] = 5 \times 10^{-4}$  mol/L,  $[4] = 5 \times 10^{-4}$  mol/L,  $[5] = 5 \times 10^{-4}$  mol/L in THF solution, 2 mm quartz cells. The conjugations of **3-5** are adjusted by the addition of TFA and TEA.

**Table S1.** Values of energies, oscillator strengths and dominant contributions of the respective molecular orbitals of **Rd-B-Open** for  $S_0 \rightarrow S_n$ .

| State | Energy (ev) | Oscillator strength | Major MO $\rightarrow$ MO contributions (%)                                                                                          |
|-------|-------------|---------------------|--------------------------------------------------------------------------------------------------------------------------------------|
| $S_1$ | 3.0042      | 1.0011              | HOMO $\rightarrow$ LUMO (100)                                                                                                        |
| $S_2$ | 3.6957      | 0.0057              | HOMO-2 $\rightarrow$ LUMO (20)<br>HOMO-1 $\rightarrow$ LUMO (80)                                                                     |
| $S_3$ | 4.3915      | 0.2010              | HOMO-2 $\rightarrow$ LUMO (69)<br>HOMO-1 $\rightarrow$ LUMO (20)<br>HOMO $\rightarrow$ LUMO+2 (8)<br>HOMO $\rightarrow$ LUMO+4 (3)   |
| $S_4$ | 4.5199      | 0.0027              | HOMO-4 $\rightarrow$ LUMO (3)<br>HOMO-3 $\rightarrow$ LUMO (97)                                                                      |
| $S_5$ | 4.7084      | 0.0011              | HOMO-5 $\rightarrow$ LUMO (65)<br>HOMO-4 $\rightarrow$ LUMO (22)<br>HOMO-1 $\rightarrow$ LUMO+2 (5)<br>HOMO $\rightarrow$ LUMO+5 (8) |
| $S_6$ | 4.7888      | 0.0585              | HOMO-2 $\rightarrow$ LUMO (3)<br>HOMO $\rightarrow$ LUMO+1 (97)                                                                      |

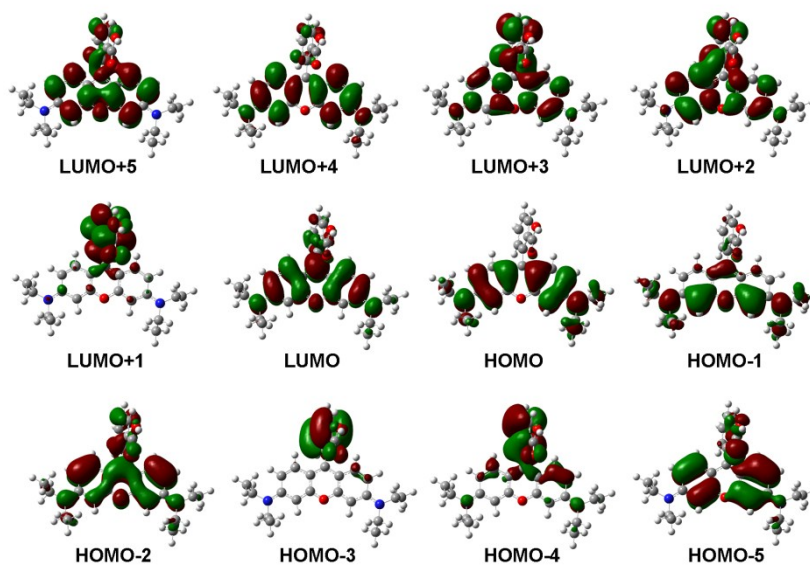

**Figure S6.** Calculated orbital energy diagram of **Rd-B-Open**.

**Table S2.** Values of energies, oscillator strengths and dominant contributions of the respective molecular orbitals of **1-Zn-Open** for  $S_0 \rightarrow S_n$ .

| State | Energy (ev) | Oscillator strength | Major MO $\rightarrow$ MO contributions (%)                                                                                                                                                            |
|-------|-------------|---------------------|--------------------------------------------------------------------------------------------------------------------------------------------------------------------------------------------------------|
| $S_1$ | 2.3705      | 0.0141              | HOMO $\rightarrow$ LUMO (100)                                                                                                                                                                          |
| $S_2$ | 2.9062      | 0.9184              | HOMO $\rightarrow$ LUMO+1 (94)<br>HOMO $\rightarrow$ LUMO+2 (6)                                                                                                                                        |
| $S_3$ | 2.9859      | 0.1189              | HOMO-7 $\rightarrow$ LUMO (32)<br>HOMO-3 $\rightarrow$ LUMO (63)<br>HOMO-2 $\rightarrow$ LUMO (5)                                                                                                      |
| $S_4$ | 3.3840      | 0.0250              | HOMO-7 $\rightarrow$ LUMO (3)<br>HOMO-1 $\rightarrow$ LUMO (91)<br>HOMO-1 $\rightarrow$ LUMO+1 (6)                                                                                                     |
| $S_5$ | 3.6346      | 0.0171              | HOMO-2 $\rightarrow$ LUMO (3)<br>HOMO-2 $\rightarrow$ LUMO+1 (17)<br>HOMO-1 $\rightarrow$ LUMO (5)<br>HOMO-1 $\rightarrow$ LUMO+1 (70)<br>HOMO-1 $\rightarrow$ LUMO+2 (5)                              |
| $S_6$ | 3.6957      | 0.1314              | HOMO-9 $\rightarrow$ LUMO (18)<br>HOMO-7 $\rightarrow$ LUMO (12)<br>HOMO-2 $\rightarrow$ LUMO (12)<br>HOMO $\rightarrow$ LUMO+1 (4)<br>HOMO $\rightarrow$ LUMO+2 (51)<br>HOMO $\rightarrow$ LUMO+3 (3) |

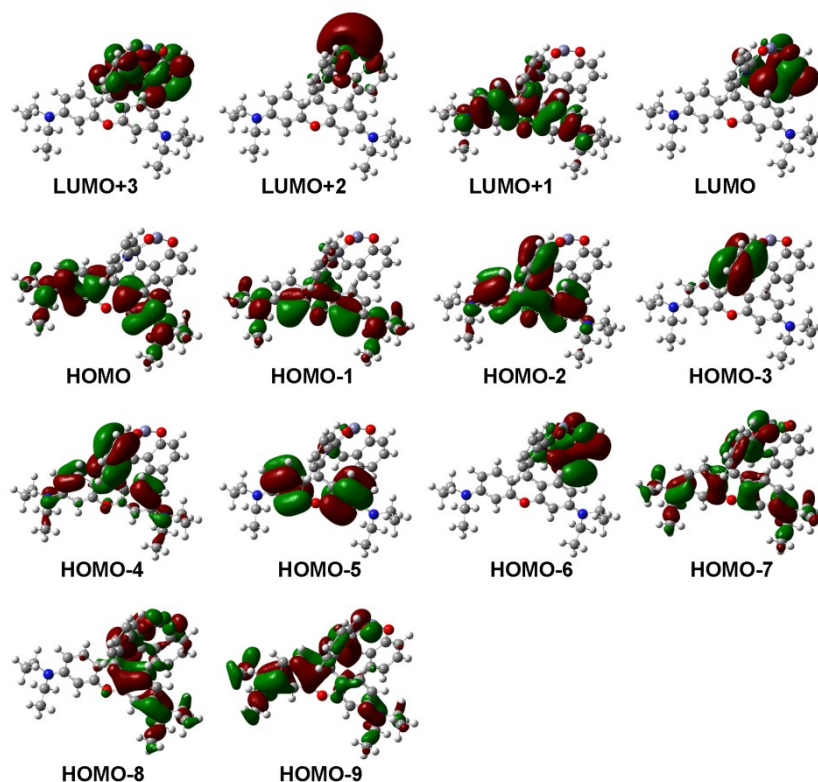

**Figure S7.** Calculated orbital energy diagram of **1-Zn-Open**.

**Table S3.** The influence of different wavelength light to the color change of **1-Zn**.<sup>[a]</sup>

| Wavelength/nm               | 365 | 400 | 425 | 450 | 475 | 500 | 550 | 600 | 650 |
|-----------------------------|-----|-----|-----|-----|-----|-----|-----|-----|-----|
| Color change of <b>1-Zn</b> | Yes | Yes | Yes | Yes | No  | No  | No  | No  | No  |

<sup>[a]</sup> Light of different wavelengths are produced by a CEL-HXF300 xenon light source with different optical filters.
